# Supplementary material for: Social perspective-taking as a catalyst to building common ground between opposing parties
Source: Research Square preprint supplement (doi:10.21203/rs.3.rs-8234296/v1), 2025-12-08
Supplement: Supplementary file 1 [file 24017605bdd5eb6f8bd3c5cb.docx]

**Supplementary Materials**

**Figure A.1**

*Overall Flow of the Procedure*


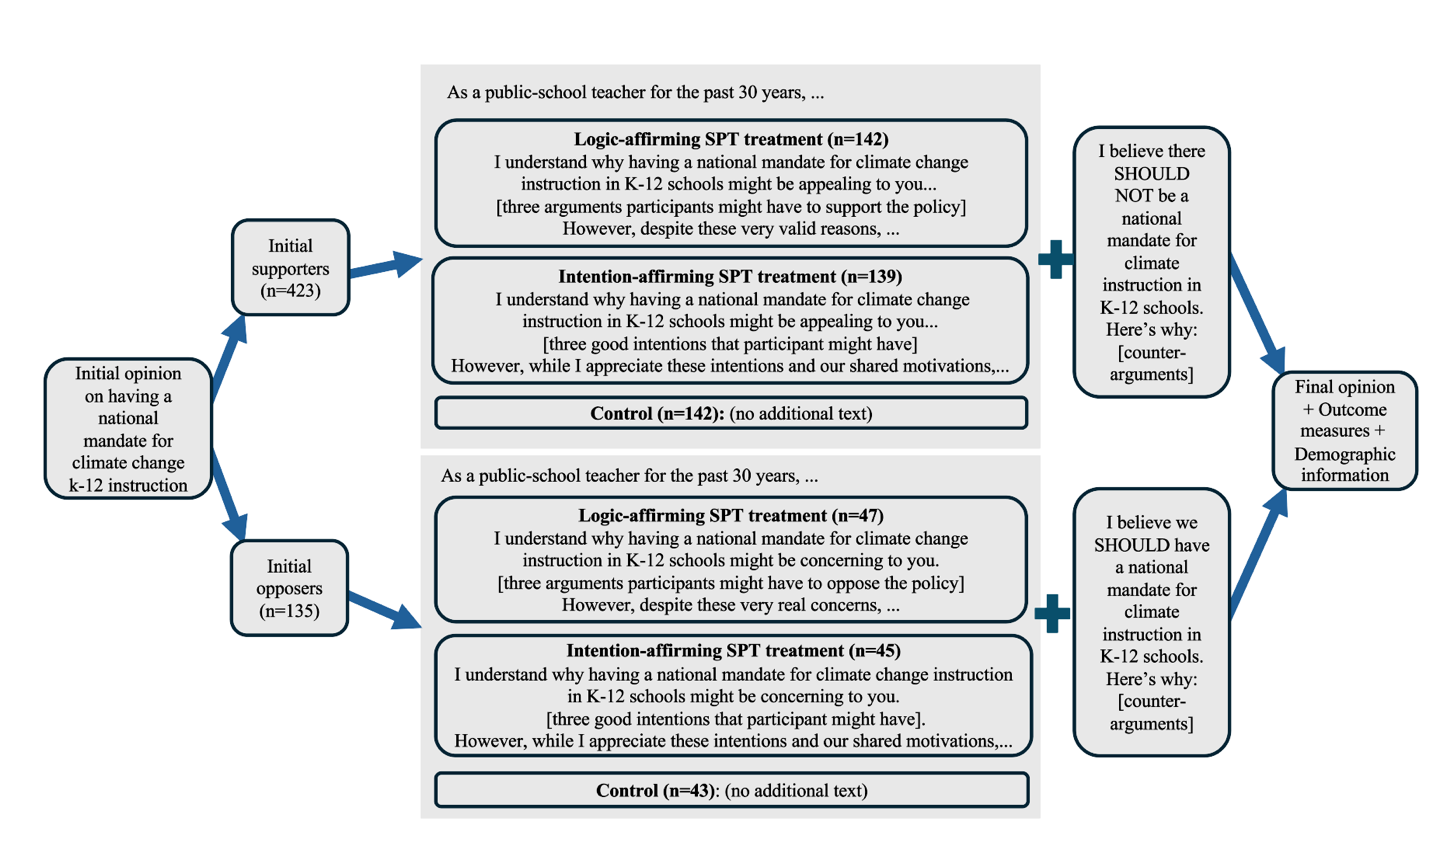


**Figure A.2**

*Logic-Affirming SPT Treatment for Initial Supporters (left) and Initial Opposers (right)*


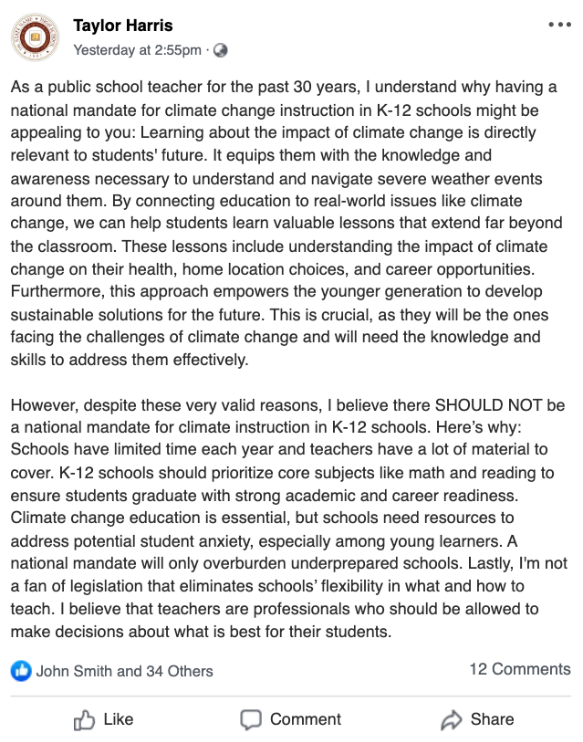
 
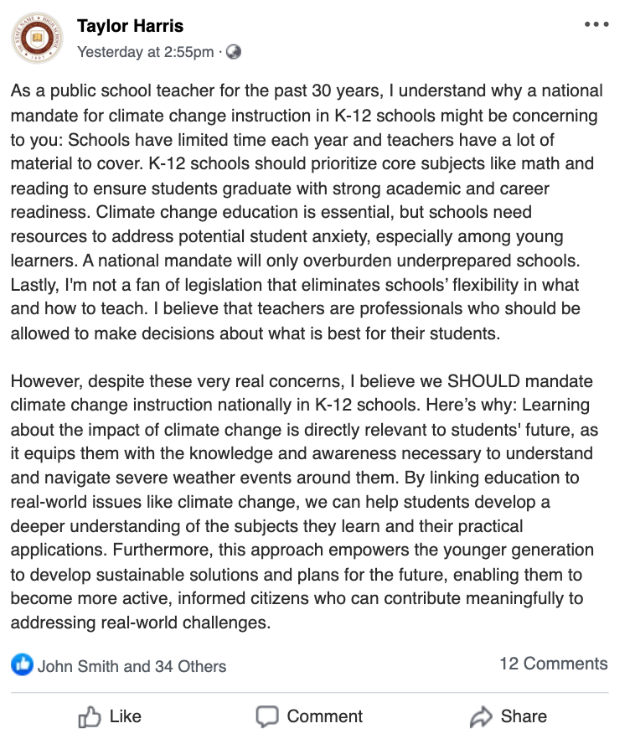


**Figure A.3**

*Intention-Affirming SPT Treatment for Initial Supporters (left) and Initial Opposers (right)*


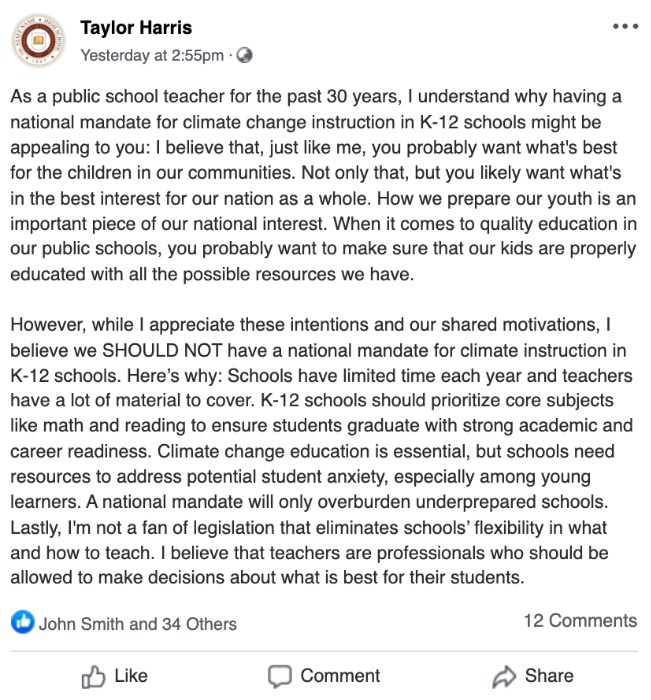
 
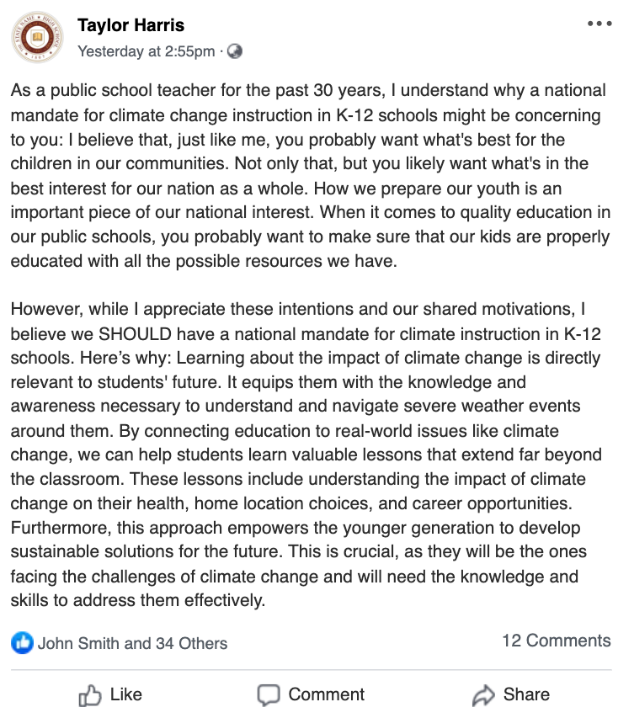


**Figure A.4**

*Control Text for Initial Supporters (left) and Initial Opposers (right)*


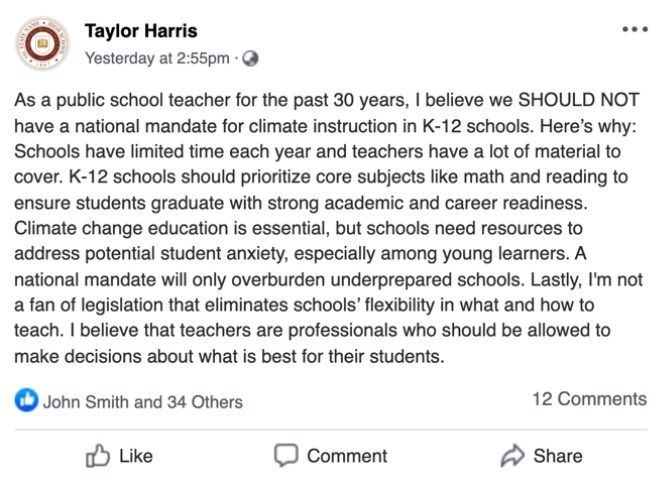

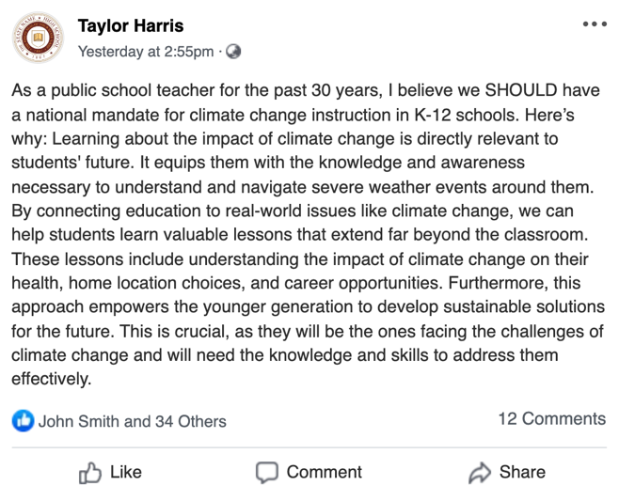


**Table A.1**

*Items for Composite Scales*

| **Scale** | **Statement** | **Choice Options & Codes** | | | | |
| --- | --- | --- | --- | --- | --- | --- |
|  |  | **1** | **2** | **3** | **4** | **5** |
| **Perceived SPT** | |  |  |  |  |  |
| **Item 1** | In writing the post, how much effort do you think the teacher put into taking the perspective of people like you on this issue? | No effort at all | A bit of effort | A moderate amount of effort | Quite some effort | Lots of effort |
| **Item 2** | Overall, how motivated do you think the teacher would be to understand how you feel about this issue? | Not motivated at all | Slightly motivated | Somewhat motivated | Quite motivated | Extremely motivated |
| **Item 3** | How clearly do you think the teacher understood your point of view? | Not clearly at all | Slightly clearly | Somewhat clearly | Quite clearly | Extremely clearly |
| **Item 4** | How accurately do you think the teacher would describe how you see this issue? | Not accurately at all | Slightly accurately | Moderately accurately | Quite accurately | Extremely accurately |
| **Perceived Similarity** | |  |  |  |  |  |
| **Item 1** | Overall, how much would you guess that you have in common with the teacher? | Almost nothing in common | A little bit in common | A moderate amount in common | Quite a bit in common | A great deal in common |
| **Item 2** | How similar do you think your personality is to the teacher's personality? | Not similar at all | Slightly similar | Somewhat similar | Quite similar | Extremely similar |
| **Item 3** | If you discussed the issue of national curriculum mandate with the teacher, how much common ground do you think you would find? | None at all | A little | A moderate amount | A lot | A great deal |
| **Item 4** | For climate change education issues, how similar do you think your attitudes and the teacher's attitudes are? | Not similar at all | Slightly similar | Somewhat similar | Quite similar | Extremely similar |
| **Perceived Fairness** | |  |  |  |  |  |
| **Item 1** | Overall, how fair was the teacher's treatment of each side of the issue? | Not fair at all | Slightly fair | Somewhat fair | Quite fair | Extremely fair |
| **Item 2** | How fair do you think the information presented was to both sides? | Not fair at all | Slightly fair | Somewhat fair | Quite fair | Extremely fair |
| **Item 3** | How similar was the quality of the information that the teacher presented for both sides? | Not similar at all | Slightly similar | Somewhat similar | Quite similar | Extremely similar |
| **Item 4** | For the two sides, how balanced was the amount of information that the teacher presented? | Not balanced at all | Slightly balanced | Somewhat balanced | Quite balanced | Extremely balanced |
| **Anticipated Relationship** | |  |  |  |  |  |
| **Item 1** | How much do you think you would enjoy having a conversation with the teacher? | Not enjoy at all | Enjoy a little | Enjoy a moderate amount | Enjoy a lot | Enjoy a great deal |
| **Item 2** | If you met the teacher in person, how friendly do you think they would be towards you? | Not friendly at all | Slightly friendly | Somewhat friendly | Quite friendly | Extremely friendly |
| **Item 3** | How respectful would the teacher be towards you? | Not respectful at all | Slightly respectful | Somewhat respectful | Quite respectful | Extremely respectful |
| **Item 4** | In general, how caring do you think this teacher would be towards you? | Not caring at all | Slightly caring | Somewhat caring | Quite caring | Extremely caring |
| **Personal SPT Effort** | |  |  |  |  |  |
| **Item 1** | How hard did you try to understand the merits of the opposing points of view on this issue? | Not hard at all | Slightly hard | Somewhat hard | Quite hard | Extremely hard |
| **Item 2** | How much did you try to understand the motivations of the supporters on the opposite side? | None at all | A little | A moderate amount | Quite a lot | A great deal |
| **Item 3** | How much effort did you put into figuring out the possible goals of people who disagree with your position on this issue? | Almost no effort | A little bit of effort | Some effort | Quite a lot of effort | A tremendous amount of effort |
| **Item 4** | As you were reading, how hard did you try to understand what supporters of the other side might be feeling? | Not hard at all | Slightly hard | Somewhat hard | Quite hard | Extremely hard |
| **Item 5** | Overall, how much effort did you put into figuring out what people on the opposing side might be thinking? | Almost no effort | A little bit of effort | Some effort | Quite a lot of effort | A tremendous amount of effort |

**Table A.2**

*T-Test Results for Manipulation Checks*

| **Manipulation**  **Variables** | **Initial Opinion** | **Treatment** | **Control** | | **Treatment** | | **Δ Mean** | **SE** | **95% CI** | | ***t*** | ***p*** |
| --- | --- | --- | --- | --- | --- | --- | --- | --- | --- | --- | --- | --- |
|  | n | Mean | n | mean |  |  |  |  |  |  |
| 1. Percentage of supportive message | Support | Logic | 142 | 8.4 | 142 | 26.99 | 18.59 | 2.01 | -22.54 | -14.64 | –9.26 | <0.001 |
| 2. Percentage of opposing message | Oppose | Logic | 43 | 3.84 | 47 | 30.40 | 26.57 | 4.25 | -35.03 | -18.10 | –6.24 | <0.001 |
| 3. Percentage of intention-affirming message | Support | Intention | 142 | 26 | 139 | 41.58 | 15.58 | 2.95 | -21.39 | -9.77 | –5.28 | <0.001 |
| Oppose | Intention | 43 | 17.12 | 45 | 35.80 | 18.68 | 6.00 | -30.62 | -6.75 | –3.11 | 0.0025 |

**Table A.3**

*Unstandardized and standardized regression output for preregistered hypothesis testing (N=557)*

|  | Perceived SPT | Perceived similarity | Perceived fairness | Anticipated relationship | Personal SPT effort | Opinion change |
| --- | --- | --- | --- | --- | --- | --- |
| *Unstandardized Coefficient* | |  |  |  |  |  |
| Logic-affirming SPT | **0.99***** | **0.55***** | **1.27***** | **0.57***** | **0.20*** | 0.23 |
|  | **[0.82,1.17]** | **[0.39,0.72]** | **[1.09,1.45]** | **[0.40,0.74]** | **[0.04,0.36]** | [-0.12,0.58] |
| Intention-affirming SPT | **0.40***** | **0.27**** | **0.51***** | **0.30***** | 0.10 | 0.09 |
|  | **[0.22,0.58]** | **[0.10,0.44]** | **[0.32,0.70]** | **[0.13,0.47]** | [-0.06,0.26] | [-0.25,0.44] |
| Initial opinion | 0.05** | 0.03* | 0.05** | 0.03 | 0.04* | 0.12** |
|  | [0.01,0.08] | [0.00,0.07] | [0.02,0.09] | [-0.01,0.06] | [0.01,0.07] | [0.05,0.19] |
| Political orientation | -0.04 | -0.01 | -0.03 | -0.01 | 0.02 | 0.10 |
|  | [-0.09,0.01] | [-0.06,0.04] | [-0.08,0.03] | [-0.06,0.03] | [-0.03,0.06] | [-0.02,0.21] |
| Constant | 2.13*** | 2.00*** | 1.81*** | 2.73*** | 2.81*** | -0.51 |
|  | [1.74,2.52] | [1.63,2.37] | [1.41,2.21] | [2.36,3.10] | [2.44,3.18] | [-1.42,0.39] |
| *Standardized Coefficient* |  |  |  |  |  |  |
| Logic-affirming SPT | **0.48***** | **0.30***** | **0.56***** | **0.31***** | **0.12*** | 0.06 |
|  | **[0.82,1.17]** | **[0.39,0.72]** | **[1.09,1.45]** | **[0.40,0.74]** | **[0.04,0.36]** | [-0.12,0.58] |
| Intention-affirming SPT | **0.19***** | **0.15**** | **0.23***** | **0.16***** | 0.06 | 0.02 |
|  | **[0.22,0.58]** | **[0.10,0.44]** | **[0.32,0.70]** | **[0.13,0.47]** | [-0.06,0.26] | [-0.25,0.44] |
| Initial opinion | 0.13** | 0.11* | 0.14** | 0.08 | 0.14* | 0.19** |
|  | [0.01,0.08] | [0.00,0.07] | [0.02,0.09] | [-0.01,0.06] | [0.01,0.07] | [0.05,0.19] |
| Political orientation | -0.08 | -0.02 | -0.04 | -0.03 | 0.04 | 0.10 |
|  | [-0.09,0.01] | [-0.06,0.04] | [-0.08,0.03] | [-0.06,0.03] | [-0.03,0.06] | [-0.02,0.21] |
| *R*2 | 0.20 | 0.08 | 0.26 | 0.08 | 0.03 | 0.03 |
| adj. *R*2 | 0.20 | 0.08 | 0.26 | 0.08 | 0.02 | 0.02 |
| *AIC* | 1448.13 | 1381.15 | 1497.47 | 1382.05 | 1322.49 | 2205.62 |
| *BIC* | 1469.74 | 1402.77 | 1519.08 | 1403.66 | 1344.11 | 2227.23 |

*Note.*The baseline group is the control condition; 95% confidence intervals in brackets.  ** p <.05, ** p <.01, *** p <.001*
